# Supplementary material
Source: PubMed Central journal article supplement (PMC6748777)
Supplement: btz114_supplementary_data.pdf [file btz114_supplementary_data.pdf]

## **Differential Network Enrichment Analysis Reveals Novel Lipid Pathways in Chronic Kidney Disease**

Jing Ma<sup>1\*</sup>, Alla Karnovsky<sup>2,4\*</sup>, Farsad Afshinnia<sup>3\*</sup>, Janis Wigginton<sup>4</sup>, Daniel J. Rader<sup>5</sup>, Loki Natarajan<sup>6</sup>, Kumar Sharma<sup>7</sup>, Anna C. Porter<sup>8</sup>, Mahboob Rahman<sup>9</sup>, Jiang He<sup>10</sup>, Lee Hamm<sup>11</sup>, Tariq Shafi<sup>12</sup>, Debbie Gipson<sup>13</sup>, Crystal Gadegbeku<sup>14</sup>, Harold Feldman<sup>15</sup>, George Michailidis<sup>4,16#</sup> and Subramaniam Pennathur<sup>3,4,17#</sup> and the CRIC and the CPROBE study investigators.

\*These authors contributed equally to this manuscript.

# Senior Authors

### **Affiliations:**

<sup>1</sup> Division of Public Health Sciences, Fred Hutchinson Cancer Research Center

<sup>2</sup> Department of Computational Medicine & Bioinformatics, University of Michigan Health System

<sup>3</sup> Department of Internal Medicine-Nephrology, University of Michigan Health System

<sup>4</sup> Michigan Regional Comprehensive Metabolomics Resource Core, University of Michigan Health System

<sup>5</sup> Translational-Clinical Research, University of Pennsylvania

<sup>6</sup> Department of Family Medicine and Public Health, University of California at San Diego

<sup>7</sup> Department of Internal Medicine-Nephrology, University of Texas Health at San Antonio

<sup>8</sup> Department of Internal Medicine-Nephrology, University of Illinois at Chicago

<sup>9</sup> Department of Internal Medicine-Nephrology, Case-Western Reserve University

<sup>10</sup> Department of Epidemiology, Tulane University School of Medicine

<sup>11</sup> Division of Nephrology and Hypertension, Tulane University

<sup>12</sup> Department of Internal Medicine-Nephrology, Johns Hopkins University

<sup>13</sup> Department of Pediatrics, University of Michigan Health System, Ann Arbor, MI

<sup>14</sup> Department of Internal Medicine-Nephrology, Temple University

<sup>15</sup> Center for Clinical Epidemiology and Biostatistics, University of Pennsylvania

<sup>16</sup> Department of Statistics and the Informatics Institute, University of Florida

<sup>17</sup> Department of Molecular and Integrative Physiology, University of Michigan Health System

**Address and email for Corresponding authors:** gmichail@ufl.edu, spennath@med.umich.edu

**Running title:** Differential enrichment of lipids in CKD

**Supplementary Table 1: CPROBE clusters**

| Cluster Name | #Nodes | #Edges | #Sig. Nodes | #Diff. Edges | P-Value   | Q-Value FDR |
|--------------|--------|--------|-------------|--------------|-----------|-------------|
| Cluster1     | 24     | 33     | 4           | 10           | 2.83E-08  | 3.39E-07    |
| Cluster2     | 18     | 23     | 5           | 11           | 8.99E-06  | 5.39E-05    |
| Cluster3     | 9      | 9      | 2           | 4            | 0.0002966 | 0.001187    |
| Cluster4     | 20     | 20     | 1           | 12           | 0.003977  | 0.01193     |
| Cluster5     | 48     | 62     | 1           | 37           | 0.01678   | 0.04028     |
| Cluster6     | 17     | 21     | 1           | 8            | 0.04436   | 0.07604     |
| Cluster7     | 10     | 14     | 0           | 2            | 0.04139   | 0.07604     |
| Cluster8     | 18     | 22     | 0           | 8            | 0.05173   | 0.0776      |
| Cluster9     | 13     | 17     | 1           | 9            | 0.1579    | 0.2105      |
| Cluster10    | 10     | 9      | 1           | 6            | 0.211     | 0.2532      |
| Cluster11    | 20     | 23     | 0           | 13           | 0.4614    | 0.5034      |
| Cluster12    | 42     | 59     | 0           | 20           | 0.6011    | 0.6011      |

**Supplementary Table 2: CRIC clusters**

| Cluster Name | #Nodes | #Edges | #Sig. Nodes | #Diff. Edges | P-Value  | Q-Value FDR |
|--------------|--------|--------|-------------|--------------|----------|-------------|
| Cluster1     | 10     | 12     | 8           | 7            | 4.84E-17 | 6.30E-16    |
| Cluster2     | 25     | 32     | 4           | 13           | 1.39E-12 | 9.01E-12    |
| Cluster3     | 39     | 46     | 7           | 21           | 5.51E-12 | 2.39E-11    |
| Cluster4     | 14     | 16     | 1           | 9            | 6.23E-07 | 2.02E-06    |
| Cluster5     | 5      | 4      | 1           | 3            | 1.33E-06 | 3.46E-06    |
| Cluster6     | 10     | 10     | 1           | 5            | 4.03E-06 | 8.73E-06    |
| Cluster7     | 20     | 26     | 0           | 10           | 0.005705 | 0.01059     |
| Cluster8     | 19     | 21     | 0           | 10           | 0.04874  | 0.07921     |
| Cluster9     | 24     | 35     | 1           | 12           | 0.22     | 0.3178      |
| Cluster10    | 22     | 23     | 1           | 12           | 0.2736   | 0.3557      |
| Cluster11    | 23     | 30     | 0           | 6            | 0.5485   | 0.6483      |
| Cluster12    | 25     | 34     | 1           | 14           | 0.6112   | 0.6622      |
| Cluster13    | 20     | 24     | 0           | 14           | 0.7006   | 0.7006      |
